# Supplementary material
Source: publisher site journal article supplement (https://www.dovepress.com/article/366851)
Supplement: Supplementary file 1 [file get_supplementary_file.php]

---

**Supplementary Table 1. Numbers of Patients Classified as Moderate to Severe Malnutrition according to Different Indexes.**

| <b>Index</b> | <b>Moderate to Severe</b> | <b>Absent or mild</b> |
|--------------|---------------------------|-----------------------|
| CONUT, n (%) | 42 (5.7%)                 | 690 (94.3%)           |
| GNRI, n (%)  | 157 (21.4%)               | 575 (78.6%)           |
| PNI, n (%)   | 34 (4.6%)                 | 698 (95.4%)           |
| All, n (%)   | 21 (2.9%)                 | 715 (97.1%)           |

**Supplementary Table 2. Univariable Analysis of the Risk Factors for END.**

| <b>Characteristics</b>               | <b>Univariate Cox regression</b> |                |
|--------------------------------------|----------------------------------|----------------|
|                                      | <b>OR (95% CI)</b>               | <b>P value</b> |
| Age, years                           | 1.037 (1.008-1.068)              | 0.014          |
| Male, n (%)                          | 0.823 (0.595-1.142)              | 0.242          |
| Height, cm                           | 0.991 (0.970-1.011)              | 0.366          |
| Weight, kg                           | 0.974 (0.959-0.989)              | 0.001          |
| Body mass index, kg/m <sup>2</sup>   | 0.920 (0.875-0.967)              | 0.001          |
| Vascular risk factors, n (%)         |                                  |                |
| Hypertension                         | 1.587 (1.121-2.268)              | 0.010          |
| Diabetes mellitus                    | 2.226 (1.592-3.113)              | <0.001         |
| Hyperlipidemia                       | 1.210 (0.819-1.774)              | 0.332          |
| Atrial fibrillation                  | 1.074 (0.647-1.746)              | 0.778          |
| Smoking                              | 0.962 (0.687-1.339)              | 0.818          |
| Drinking                             | 0.968 (0.683-1.363)              | 0.853          |
| Coronary heart disease               | 1.294 (0.790-2.090)              | 0.297          |
| SBP, mmHg                            | 1.015 (1.006-1.023)              | 0.001          |
| DBP, mmHg                            | 1.007 (0.993-1.020)              | 0.330          |
| NIHSS, score                         | 1.003 (0.968-1.004)              | 0.849          |
| Pneumonia                            | 1.367 (0.855-2.162)              | 0.185          |
| Infarct site, n (%)                  |                                  |                |
| Lobe                                 | Reference                        |                |
| Basal ganglia                        | 1.462 (0.960-2.239)              | 0.079          |
| Tentorium cerebelli                  | 0.925 (0.527-1.600)              | 0.782          |
| Others                               | 0.980 (0.644-1.496)              | 0.924          |
| TOAST, n (%)                         |                                  |                |
| LAA                                  | Reference                        |                |
| CE                                   | 1.239 (0.729-2.079)              | 0.422          |
| SAA                                  | 1.112 (0.781-1.582)              | 0.554          |
| SOE                                  | 1.394 (0.667-2.843)              | 0.365          |
| SUE                                  | 0.230 (0.086-0.511)              | 0.001          |
| Laboratory data                      |                                  |                |
| Total cholesterol, mmol/L            | 1.064 (0.926-1.223)              | 0.382          |
| Triglyceride, mmol/L                 | 0.771 (0.630-0.931)              | 0.009          |
| Low-density lipoprotein, mmol/L      | 1.172 (0.977-1.407)              | 0.087          |
| High-density lipoprotein, mmol/L     | 1.168 (0.742-1.833)              | 0.501          |
| Fasting plasma glucose, mmol/L       | 1.162 (1.084-1.248)              | <0.001         |
| Homocysteine, $\mu$ mol/L            | 1.015 (0.994-1.035)              | 0.154          |
| White blood cell, 10 <sup>9</sup> /L | 1.027 (0.986-1.069)              | 0.196          |
| C-reactive protein, mg/L             | 1.065 (1.043-1.089)              | <0.001         |

|                                      |                      |        |
|--------------------------------------|----------------------|--------|
| Albumin, g/L                         | 0.926 (0.893-0.960)  | <0.001 |
| Lymphocyte count, 10 <sup>9</sup> /L | 0.796 (0.619-1.017)  | 0.070  |
| Uric acid, μmol/L                    | 1.001 (0.999-1.002)  | 0.153  |
| Malnutrition, n (%)                  |                      |        |
| CONUT                                |                      |        |
| Absent                               | Reference            |        |
| Mild                                 | 1.033 (0.749-1.425)  | 0.843  |
| Moderate                             | 2.789 (1.368-5.785)  | 0.005  |
| Severe                               | 6.606 (1.494-45.605) | 0.022  |
| GNRI                                 |                      |        |
| Absent                               | Reference            |        |
| Mild                                 | 0.707 (0.357-1.312)  | 0.292  |
| Moderate                             | 2.380 (1.631-3.476)  | 0      |
| Severe                               | 5.505 (1.764-20.569) | 0.005  |
| PNI                                  |                      |        |
| Absent                               | Reference            |        |
| Moderate                             | 1.132 (0.420-2.803)  | 0.794  |
| Severe                               | 7.708 (2.38-34.328)  | 0.002  |

Abbreviations: CE, cardio-embolism; CI, confidence interval; CONUT, controlling nutritional status score; DBP, diastolic blood pressure; GNRI, geriatric nutritional risk index; LAA, large-artery atherosclerosis; NIHSS, National Institute of Health Stroke Scale; OR, odds ratio; PNI, prognostic nutritional index; SAA, small-vessel occlusion; SOE, stroke of other determined etiology; SUE, stroke of undetermined etiology; SBP, systolic blood pressure.

**Supplementary Table 3. Final Models of the Back-ward Selection for 3 Malnutrition Indexes.**

| <b>Variables</b>                 | <b>Coefficients</b> | <b>Standard Error</b> | <b>P value</b> |
|----------------------------------|---------------------|-----------------------|----------------|
| Intercept                        | -0.688              | 0.760                 | 0.365          |
| Diabetes mellitus, n (%)         | 1.203               | 0.197                 | <0.001         |
| Hypertension, n (%)              | 0.406               | 0.212                 | 0.055          |
| C-reactive protein, mg/L         | 0.087               | 0.013                 | <0.001         |
| TOAST, n (%)                     |                     |                       |                |
| LAA                              | Reference           |                       |                |
| CE                               | 0.385               | 0.300                 | 0.200          |
| SAA                              | 0.363               | 0.200                 | 0.070          |
| SOE                              | 0.606               | 0.400                 | 0.130          |
| SUE                              | -1.601              | 0.490                 | 0.001          |
| Homocysteine, $\mu\text{mol/L}$  | 0.050               | 0.012                 | <0.001         |
| Triglyceride, mmol/L             | -0.360              | 0.116                 | 0.002          |
| Body mass index, $\text{kg/m}^2$ | -0.082              | 0.028                 | 0.003          |
| CONUT, per one point increment   | 0.191               | 0.052                 | <0.001         |
| Intercept                        | -0.586              | 0.755                 | 0.438          |
| Diabetes mellitus, n (%)         | 1.253               | 0.199                 | <0.001         |
| Hypertension, n (%)              | 0.418               | 0.214                 | 0.050          |
| C-reactive protein, mg/L         | 0.089               | 0.013                 | <0.001         |
| TOAST, n (%)                     |                     |                       |                |
| LAA                              | Reference           |                       |                |
| CE                               | 0.405               | 0.303                 | 0.181          |
| SAA                              | 0.380               | 0.202                 | 0.059          |
| SOE                              | 0.676               | 0.401                 | 0.092          |
| SUE                              | -1.619              | 0.504                 | 0.001          |
| Homocysteine, $\mu\text{mol/L}$  | 0.053               | 0.013                 | <0.001         |
| Triglyceride, mmol/L             | -0.361              | 0.116                 | 0.002          |
| Body mass index, $\text{kg/m}^2$ | -0.081              | 0.028                 | 0.004          |
| CONUT, n (%)                     |                     |                       |                |
| Absent                           | Reference           |                       |                |
| Mild                             | 0.117               | 0.183                 | 0.523          |
| Moderate                         | 1.473               | 0.414                 | <0.001         |
| Severe                           | 2.786               | 0.869                 | 0.001          |
| Intercept                        | 2.711               | 0.957                 | 0.005          |
| Diabetes mellitus, n (%)         | 1.181               | 0.197                 | <0.001         |
| Hypertension, n (%)              | 0.395               | 0.213                 | 0.064          |
| C-reactive protein, mg/L         | 0.086               | 0.013                 | <0.001         |
| TOAST, n (%)                     |                     |                       |                |
| LAA                              | Reference           |                       |                |

|                                   |           |       |        |
|-----------------------------------|-----------|-------|--------|
| CE                                | 0.342     | 0.302 | 0.257  |
| SAA                               | 0.325     | 0.200 | 0.104  |
| SOE                               | 0.535     | 0.398 | 0.179  |
| SUE                               | -1.646    | 0.491 | 0.001  |
| Homocysteine, $\mu\text{mol/L}$   | 0.051     | 0.012 | <0.001 |
| Triglyceride, $\text{mmol/L}$     | -0.347    | 0.115 | 0.002  |
| Body mass index, $\text{kg/m}^2$  | -0.076    | 0.028 | 0.006  |
| PNI, per one point increment      | -0.066    | 0.015 | <0.001 |
| Intercept                         | -0.379    | 0.745 | 0.611  |
| Diabetes mellitus, n (%)          | 1.246     | 0.199 | <0.001 |
| Hypertension, n (%)               | 0.414     | 0.214 | 0.053  |
| C-reactive protein, $\text{mg/L}$ | 0.087     | 0.013 | <0.001 |
| TOAST, n (%)                      |           |       |        |
| LAA                               | Reference |       |        |
| CE                                | 0.357     | 0.303 | 0.239  |
| SAA                               | 0.353     | 0.201 | 0.079  |
| SOE                               | 0.678     | 0.397 | 0.088  |
| SUE                               | -1.817    | 0.535 | 0.001  |
| Homocysteine, $\mu\text{mol/L}$   | 0.054     | 0.012 | <0.001 |
| Triglyceride, $\text{mmol/L}$     | -0.363    | 0.116 | 0.002  |
| Body mass index, $\text{kg/m}^2$  | -0.086    | 0.028 | 0.002  |
| PNI, n (%)                        |           |       |        |
| Absent                            | Reference |       |        |
| Moderate                          | 0.421     | 0.529 | 0.426  |
| Severe                            | 3.021     | 0.716 | <0.001 |
| Intercept                         | 4.848     | 1.289 | <0.001 |
| Diabetes mellitus, n (%)          | 1.189     | 0.198 | <0.001 |
| Hypertension, n (%)               | 0.436     | 0.213 | 0.041  |
| C-reactive protein, $\text{mg/L}$ | 0.087     | 0.013 | <0.001 |
| TOAST, n (%)                      |           |       |        |
| LAA                               |           |       |        |
| CE                                | 0.342     | 0.303 | 0.259  |
| SAA                               | 0.300     | 0.201 | 0.134  |
| SOE                               | 0.582     | 0.400 | 0.146  |
| SUE                               | -1.614    | 0.489 | 0.001  |
| Homocysteine, $\mu\text{mol/L}$   | 0.051     | 0.012 | <0.001 |
| Triglyceride, $\text{mmol/L}$     | -0.363    | 0.116 | 0.002  |
| Body mass index, $\text{kg/m}^2$  | -0.053    | 0.029 | 0.064  |
| GNRI, per one point increment     | -0.059    | 0.013 | <0.001 |
| Intercept                         | -2.519    | 0.393 | <0.001 |

---

|                                 |           |       |        |
|---------------------------------|-----------|-------|--------|
| Diabetes mellitus, n (%)        | 1.259     | 0.201 | <0.001 |
| Hypertension, n (%)             | 0.378     | 0.216 | 0.080  |
| C-reactive protein, mg/L        | 0.087     | 0.013 | <0.001 |
| TOAST, n (%)                    |           |       |        |
| LAA                             | Reference |       |        |
| CE                              | 0.374     | 0.305 | 0.220  |
| SAA                             | 0.298     | 0.202 | 0.140  |
| SOE                             | 0.609     | 0.404 | 0.132  |
| SUE                             | -1.745    | 0.497 | <0.001 |
| Homocysteine, $\mu\text{mol/L}$ | 0.049     | 0.012 | <0.001 |
| Triglyceride, mmol/L            | -0.342    | 0.115 | 0.003  |
| GNRI, n (%)                     |           |       |        |
| Absent                          | Reference |       |        |
| Mild                            | -0.277    | 0.365 | 0.449  |
| Moderate                        | 1.008     | 0.214 | <0.001 |
| Severe                          | 2.603     |       | <0.001 |

---

**Supplementary Table 4. Reclassification Statistics (95% CI) for END after Adding 3 Malnutrition Indexes.**

| Variables | NRI (continuous)     |                | NRI (categorical)    |                | IDI                 |                |
|-----------|----------------------|----------------|----------------------|----------------|---------------------|----------------|
|           | Estimate (95 % CI)   | <i>P</i> value | Estimate (95 % CI)   | <i>P</i> value | Estimate (95 % CI)  | <i>P</i> value |
| Model 1   |                      |                |                      |                |                     |                |
| +CONUT    | 0.104 (-0.049-0.257) | 0.183          | 0.024 (-0.037-0.086) | 0.434          | 0.010 (0.002-0.018) | 0.018          |
| +GNRI     | 0.252 (0.099-0.404)  | 0.001          | 0.162 (0.084-0.240)  | <0.001         | 0.025 (0.013-0.038) | <0.001         |
| +PNI      | 0.183 (0.029- 0.336) | 0.020          | 0.115 (0.041-0.185)  | 0.001          | 0.019 (0.008-0.030] | <0.001         |
| Model 2   |                      |                |                      |                |                     |                |
| +CONUT    | 0.235 (0.087-0.392)  | 0.002          | 0.076 (0.003-0.122)  | 0.001          | 0.014 (0.003-0.024) | 0.011          |
| +GNRI     | 0.293 (0.141-0.445)  | <0.001         | 0.078 (0.023-0.132)  | 0.005          | 0.027 (0.014-0.445) | <0.001         |
| +PNI      | 0.219 (0.066-0.372)  | 0.005          | 0.086 (0.033-0.139)  | 0.002          | 0.023 (0.011-0.035) | 0.005          |

Abbreviations: CI, confidence interval; CONUT, controlling nutritional status score; GNRI, geriatric nutritional risk index; IDI, integrated discrimination improvement; NIHSS, National Institute of Health Stroke Scale; NRI, net reclassification improvement; OR, odds ratio; PNI, prognostic nutritional index.

Model 1, adjusted for age, sex, atrial fibrillation, hypertension, diabetes mellitus, hyperlipidemia, coronary heart disease, smoking and drinking.

Model 2, adjusted for variables finally included in the model after back-ward selection.
